# Supplementary figures and images for: dbHiMo: a web-based epigenomics platform for histone-modifying enzymes
Source: Oxford University Press journal article supplement (doi:10.1093/database/bav052), 2015-06-08

Supplementary Figure S1

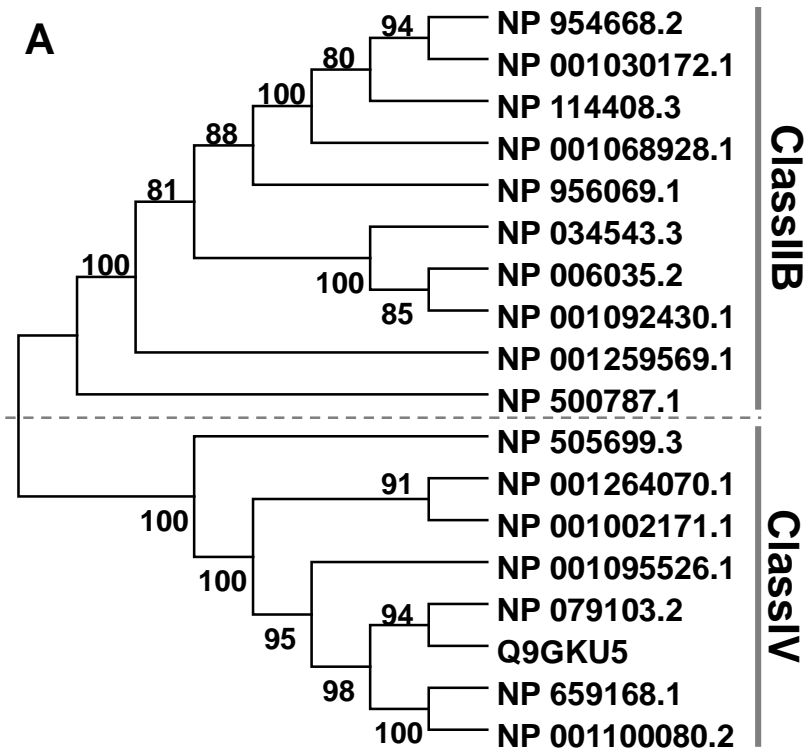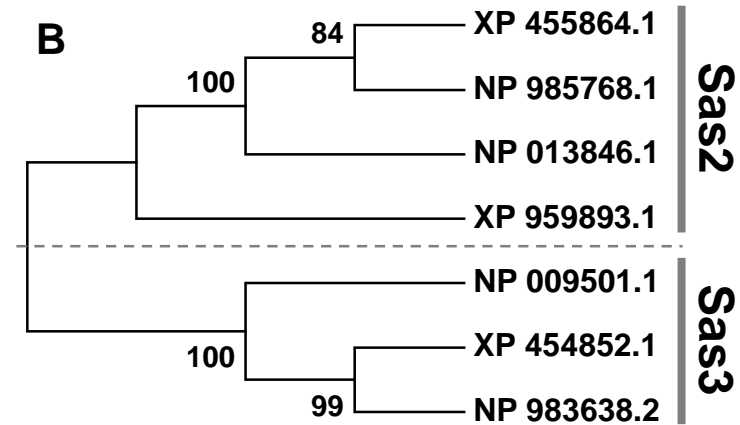

Supplement: bav052_Supplementary_Data.zip [file bav052_Supplementary_Data.zip]
